# Supplementary material for: OH and HO 2 radicals chemistry at a suburban site during the EXPLORE-YRD campaign in 2018
Source: Copernicus journal article supplement (doi:10.5194/acp-2021-1021), 2022-01-04
Supplement: Supplementary file [file acp-2021-1021-AC2-supplement.pdf]

**General comments:**

*The paper presents OH and HO<sub>2</sub> observations made in the Yangtze River Delta and compares to model predictions using a box model constrained with the RACM2-LIM1 mechanism. The model-measurement comparison highlighted that OH concentrations were under-predicted by the model under low NO conditions, whilst modelled HO<sub>2</sub> agreed reasonable well with the HO<sub>2</sub> observed. The impact of monoterpenes on radical concentrations and ozone production was investigated as was heterogeneous HO<sub>2</sub> loss. Generally, the results were well presented and the manuscript was reasonably easy to follow although the English used could be improved on. The manuscript would be improved considerably if the results presented were discussed in the context of a wider breadth of previous literature and I have tried to highlight a number of papers that are of relevance to this work in my comments below. I recommend publication once the following comments have been addressed.*

**Answer:**

We would like to thank the reviewer for the comments and questions which helped us to improve the manuscript. The reviewer comments are given below together with our responses and changes made to the manuscript. The technical comments were changed accordingly and not listed below for simplification.

**Major Comments:**

- 1. Pg 3, lines 73 – 78: There was also a field campaign in Beijing in the summer of 2017 (Whalley et al., ACP, 21, 2125 – 2147, 2021) where OH, HO<sub>2</sub>, total RO<sub>2</sub> and kOH observations were made and compared to box model predictions. This work should be discussed and referenced in the context of previous radical measurement studies conducted in the summer in China, particularly in light of the elevated OH concentrations observed. The Beijing results should also be added to Table 3.*

**Answer:**

We added the HO<sub>x</sub> observation conducted in Beijing in the summer of 2017 in the context of previous radical measurement studies and updated the Table 3 accordingly.

We revised the sentences as ‘Six field campaigns have been implemented in China during summer periods, namely the Backgarden (2006), Heshan (2014), Shenzhen (2018) campaigns in Pearl River Delta (PRD) (Lu et al., 2012;Tan et al., 2019;Wang et al., 2019), and Yufa (2006), Wangdu (2014), and Beijing campaigns in North China Plain (NCP) (Lu et al., 2013;Tan et al., 2017;Whalley et al., 2021)...’

- 2. Pg 5, lines 127 – 133: The authors state the conversion efficiency of HO<sub>2</sub> to OH at 5 ppm NO to be 20%, but should also state the conversion efficiency at 2.5 ppm NO. From laboratory tests, what is the conversion efficiency of an alkene RO<sub>2</sub> to OH at 5 ppm and 2.5 ppm NO? The authors should discuss these details in relation to what is seen in other FAGE instruments, e.g. Fuchs et al., AMT, 4, 1209-1225, 2011 and Whalley et al., AMT, 6, 3425 – 3440, 2013.*

**Answer:**

We added some discussion about the HO<sub>2</sub> interference from RO<sub>2</sub> radical as the reviewer suggested.

We revised the second paragraph in section 2.2 as ‘Previous studies indicated that part of the RO<sub>2</sub> species derived from longer chain alkanes (> C<sub>3</sub>), alkenes, and aromatic compounds have the potential to rapidly convert to OH on the same time scale as HO<sub>2</sub> inside the fluorescence cell, and thus, might cause interference for HO<sub>2</sub> measurement (Fuchs et al., 2011;Whalley et al., 2013). To minimize the potential interference from RO<sub>2</sub>, the added maximum NO mixing ratio was chosen to be 5 ppm, resulting in the maximum HO<sub>2</sub> conversion efficiency being 20%. Furthermore, the NO injection was switched between 2.5 ppm and 5 ppm every 2 minutes, corresponding to the HO<sub>2</sub> conversion efficiencies of 10% and 20%, respectively. If RO<sub>2</sub> interference was significant, the HO<sub>2</sub> measurement would be different between two NO injection modes. The HO<sub>2</sub> measurements with different NO injection rates only showed a difference of 6%, indicating that the potential interference from RO<sub>2</sub> was within the HO<sub>2</sub> measurement uncertainty (13%) during this campaign.’

3. *Pg 6, lines 140 – 147: Some key details on the chemical removal technique should be added to this paper. The concentration of propane added, the % removal of ambient OH, discussion of any losses of ambient OH to the chemical modulation device and % removal of OH internally. Again, the authors should discuss these details in relation to what is seen in other FAGE instruments, e.g. Woodward-Massey et al., AMT, 13, 3119 – 3146, 2020 and Cho et al., AMT, 14, 1851 – 1877, 2021.*

**Answer:**

We added some details on the chemical removal technique as the reviewer suggested.

We revised and extended the fourth paragraph in section 2.2 as ‘Several studies conducted in forested environments indicated that OH measurements by Laser-Induced Fluorescence technique using wavelength modulation method might suffer from unknown internal-produced interference (Mao et al., 2012;Novelli et al., 2017), and the magnitude of interference is highly dependent on the specific design of the instrument, the operating parameters, and the type of environment in which the instrument is deployed (Fuchs et al., 2016;Novelli et al., 2014;Woodward-Massey et al., 2020;Cho et al., 2021). To investigate the possible OH interference in this campaign, we performed an extended chemical modulation experiment on 7 June. During the experiment, a chemical modulation device consisting of a Teflon tube with an inner diameter of 1.0 cm and a length of 10 cm was placed on the top of the OH sampling nozzle. About 17 slpm (standard liter per minute) of ambient air was drawn through the tube by a blower, 1 slpm of which entered the fluorescence cell. Tests on the transmission efficiency of OH through the chemical modulation device showed that the signals differed by less than 7% with or without chemical modulation device, indicating

the losses of ambient OH to the chemical modulation device were insignificant. For ambient measurement application, either propane (a 12% mixture in nitrogen, 6 sccm) diluted in a carrier flow of pure nitrogen (200 sccm) or pure nitrogen (200 sccm) was injected into the center of the tube alternatively every 5 minutes via two oppositely posited needles at the entrance of Teflon tube. The ambient OH signal can be then deduced by differentiating the signals from adjacent measurement modes with and without propane injection. The amount of the scavenger added is typically selected to be sufficiently high for reacting with ambient OH but not in excess in case reacting with internal-produced OH, and thus, the scavenging efficiency is usually kept around 90%. Calibrations of OH sensitivity with and without propane injection showed the scavenging efficiency of OH was around 93% in this experiment, and the kinetic calculation indicated the added propane removed less than 0.7% of the internal-produced OH. Therefore, the real ambient OH concentration can be obtained by multiplying the differential OH signal by the scavenging efficiency and by the instrument sensitivity. More details about the prototype chemical-modulation reactor used with PKU-LIF and the calculation method can be seen in Tan et al. (2017).’

*4. Section 2.4: How were photolysis frequencies treated in the model? Was the model constrained with all measured photolysis rates?*

**Answer:**

The model was constrained with the measured photolysis frequencies  $j(\text{O}^1\text{D})$ ,  $j(\text{NO}_2)$ ,  $j(\text{HONO})$ ,  $j(\text{H}_2\text{O}_2)$ ,  $j(\text{HCHO})$ , and  $j(\text{NO}_3)$ . The photolysis frequencies of other species were calculated with the function of solar zenith angle.

We revised and added sentences at the end of the first paragraph in section 2.4 as ‘Briefly, observations of the photolysis frequencies  $j(\text{O}^1\text{D})$ ,  $j(\text{NO}_2)$ ,  $j(\text{HONO})$ ,  $j(\text{H}_2\text{O}_2)$ ,  $j(\text{HCHO})$ , and  $j(\text{NO}_3)$ ,  $\text{O}_3$ ,  $\text{NO}$ ,  $\text{NO}_2$ ,  $\text{CO}$ ,  $\text{CH}_4$ ,  $\text{SO}_2$ ,  $\text{HONO}$ , C2-C12 VOCs, and certain oxygenated VOCs such as  $\text{HCHO}$ , acetaldehyde, glyoxal and acetone as well as the meteorological parameters were used to constrain the model with a time resolution of 5 min. Photolysis frequencies of other species were calculated in the model using the following function of solar zenith angle ( $\chi$ ) and scaled to the ratio of measured to calculated  $j(\text{NO}_2)$  to represent the effect from clouds. :

$$J = l \times (\cos \chi)^m \times e^{-n \times \sec \chi} \quad (\text{Eq. 1})$$

where the optimal values of parameters  $l$ ,  $m$ , and  $n$  for each photolysis frequency were adopted (Saunders et al., 2003).’

*5. How detailed is the  $\alpha$ -pinene oxidation scheme in RACM2? It would be useful to reference the  $\alpha$ -pinene oxidation mechanism that was used.*

**Answer:**

We added a Table in the supplement to describe the  $\alpha$ -pinene oxidation scheme in RACM2.

**Table S1.  $\alpha$ -pinene oxidation mechanism in RACM2**

| Number | Reaction                                                                                                                                                                                                                                                  |
|--------|-----------------------------------------------------------------------------------------------------------------------------------------------------------------------------------------------------------------------------------------------------------|
| #1     | $\text{API} + \text{OH} \rightarrow \text{APIP}$                                                                                                                                                                                                          |
| #2     | $\text{API} + \text{O}_3 \rightarrow 0.85 \times \text{OH} + 0.1 \times \text{HO}_2 + 0.2 \times \text{ETHP} + 0.42 \times \text{KETP} + 0.14 \times \text{CO}$<br>$+ 0.02 \times \text{H}_2\text{O}_2 + 0.65 \times \text{ALD} + 0.53 \times \text{KET}$ |
| #3     | $\text{API} + \text{NO}_3 \rightarrow 0.1 \times \text{OLNN} + 0.9 \times \text{OLND}$                                                                                                                                                                    |
| #4     | $\text{APIP} + \text{NO} \rightarrow 0.82 \times \text{HO}_2 + 0.82 \times \text{NO}_2 + 0.23 \times \text{HCHO} + 0.43 \times \text{ALD}$<br>$+ 0.44 \times \text{KET} + 0.07 \times \text{ORA1} + 0.18 \times \text{ONIT}$                              |
| #5     | $\text{APIP} + \text{HO}_2 \rightarrow \text{OP2}$                                                                                                                                                                                                        |
| #6     | $\text{APIP} + \text{MO}_2 \rightarrow \text{HO}_2 + 0.75 \times \text{HCHO} + 0.75 \times \text{ALD} + 0.75 \times \text{KET} + 0.25 \times \text{MOH}$<br>$+ 0.25 \times \text{ROH}$                                                                    |
| #7     | $\text{APIP} + \text{ACO}_3 \rightarrow 0.5 \times \text{HO}_2 + 0.5 \times \text{MO}_2 + \text{ALD} + \text{KET} + \text{ORA2}$                                                                                                                          |
| #8     | $\text{APIP} + \text{NO}_3 \rightarrow \text{HO}_2 + \text{NO}_2 + \text{ALD} + \text{KET}$                                                                                                                                                               |

API denotes  $\alpha$ -pinene; APIP denotes peroxy radicals formed from API; ETHP denotes peroxy radicals formed from ethane; KETP denotes peroxy radicals formed from ketone; ALD denotes C3 and higher aldehydes; KET denotes ketones; OLNN denotes  $\text{NO}_3$ -alkene adduct reacting to form carbonitrates and  $\text{HO}_2$ ; OLND denotes  $\text{NO}_3$ -alkene adduct reacting via decomposition; ACT denotes acetone; ORA1 denotes formic acid; ONIT denotes organic nitrate; OP2 denotes higher organic peroxides;  $\text{MO}_2$  denotes methyl peroxy radical; MOH denotes methanol; ROH denotes C3 and higher alcohols;  $\text{ACO}_3$  denotes acetyl peroxy radicals; ORA2 denotes acetic acid and higher acids.

6. *The authors state that a first-order loss term equal to 8 hrs gave an observed to modelled ratio of 1.09 for PAN. Other box modelling studies, however, have had to impose a boundary layer height dependent loss rate to reproduce the diurnal trends observed for model-generated intermediates (e.g. Whalley et al., ACP, 21, 2125 – 2147, 2021). How well did the model predict the diurnal variation of PAN/ other model-generated species such as formaldehyde and glyoxal? How sensitive was the model-predicted OH and HO2 concentrations to the imposed loss rate?*

**Answer:**

We added some sentences to clarify the effect of the imposed loss rate on the model-generated intermediate in section 2.4. “The observed-to-model ratio of PAN concentration was 1.09 using this physical loss rate, while the modelled PAN concentration agreed to measurements from late morning to the midnight but slightly lower than measurements in the early morning (Fig. S2), which may relate to the effect of boundary layer height variation. To test the influence of boundary layer height diurnal variation, we performed a sensitivity test by imposing a boundary layer height (BLH, reanalysis data from European Centre for Medium-Range Weather Forecasts) dependent loss rate to all species. The model continuously underpredicted the

concentration in the early morning, and additionally, the model overestimated the observed PAN in the midday and afternoon (Fig. S2). This is because the boundary layer height dependent loss rate is largest at night, which makes the loss of PAN greater and further worsens the measurement-model comparison. Therefore, the treatment of a first-order loss term equal to 8 hours to all species in the model may not reflect the loss due to deposition but give a reasonable approximation on the overall physical loss of the model-generated intermediates. Nevertheless, the modelled OH and HO<sub>2</sub> concentrations were insensitive to the imposed loss rate (Fig. S3). The concentrations differed less than 0.5% between two cases for both OH and HO<sub>2</sub>.”

*7. Section 3.3: The modelled breakdown of OH reactivity and a comparison to the observed total reactivity was presented in Whalley et al., ACP, 21, 2125 – 2147, 2021 for the Beijing campaign and it would be useful to compare the modelled reactivity from EXPLORE-YRD to this. In Beijing a significant missing reactivity was determined and so the impact missing reactivity may have on the modelled radical concentrations during EXPLORE-YRD should be evaluated.*

**Answer:**

We added some discussions about the breakdown of OH reactivity in this study and the comparison to the observed total reactivity in other studies in Section 3.3.

‘OH reactivity ( $k_{OH}$ ) is the pseudo first-order loss rate coefficient of OH radical, and indicates the inverse of the chemical lifetime of OH radical. It can be defined by the sum of the OH reactants concentrations multiplied by their reaction rate constants versus OH radical (Fuchs et al., 2017; Lou et al., 2010):

$$k_{OH} = \sum_i k_{OH+X_i} [X_i] \quad (\text{Eq. 2})$$

In this study, the  $k_{OH}$  was calculated from measured NO, NO<sub>2</sub>, CO, CH<sub>4</sub>, SO<sub>2</sub>, C2-C12 VOCs (including isoprene and monoterpene), HCHO, acetaldehyde, glyoxal, and acetone and model-generated intermediate species (mainly referred to the unconstrained oxygenated VOCs). The calculated  $k_{OH}$  ranged between 5 s<sup>-1</sup> and 40 s<sup>-1</sup> (Fig. 3).

The typical mean diurnal variation of  $k_{OH}$  showed a peak in the early morning and then dropped by nearly 50% to a minimum in the afternoon (Fig. 7a). The averaged  $k_{OH}$  for periods with OH radical measurement was 10.8 s<sup>-1</sup> on daytime basis (08:00-16:00), and a total of 36% of the modelled  $k_{OH}$  could be attributed to the inorganic compounds (Fig. 7b). CO was the single largest contributor to  $k_{OH}$ , with a campaign average contribution of 19%. NO and NO<sub>2</sub> together contributed 15% of the modelled  $k_{OH}$ . Alkanes, alkenes, and aromatics contributed additional 15% of the modelled  $k_{OH}$ . The reactivity from isoprene made a small contribution (5%) to the modelled  $k_{OH}$  compared to other campaigns conducted in suburban China, where isoprene typically contributed about 20% of the total  $k_{OH}$  (Lou et al., 2010; Fuchs et al., 2017). The contributions that monoterpene made was 4%, which was a substantial fraction considering that the

daytime monoterpene level was usually low in suburban and urban area.

The OVOCs made up a large portion, accounting for approximately 40% of the modelled  $k_{OH}$ . The model-generated OVOCs made comparable contribution to the measured ones (22% vs. 18%), and the model-generated contribution to OH reactivity was insensitive to the imposed physical loss rate (Fig. S3). This characteristic was similar to what was observed in London and Wangdu (Whalley et al., 2016; Fuchs et al., 2017), where major OVOCs including HCHO, acetaldehyde, and acetone were directly measured and the measured OVOCs together with the modeled-generated OVOCs accounted for a large portion of the total reactivity (44% and 25%, respectively). It was noteworthy that, in both campaigns,  $k_{OH}$  was directly measured and the  $k_{OH}$  budget was largely closed. In some previous studies in urban and suburban areas, however, missing  $k_{OH}$  ranging from less than 30% to over 50% of the total reactivity was often observed (Kovacs et al., 2003; Lou et al., 2010; Shirley et al., 2006; Yang et al., 2016). The common feature of these observations was that the measurement of OVOCs was completely missing. In fact, model simulations had proved that the model-generated OVOCs from the photooxidation of measured VOCs could quantitatively explain the missing  $k_{OH}$  in most of these campaigns during daytime, and the majority of the model-generated OVOCs were HCHO, acetaldehyde, glyoxal, and the isoprene oxidation products. Therefore, in recent studies, with the improved coverage of the measurement of major OVOCs species, together with the model-generated secondary species, the calculated  $k_{OH}$  was largely in agreement with the measured  $k_{OH}$  in urban and suburban areas during the daytime. However, significant difference could still be observed in areas affected by dramatic anthropogenic influences, for instance in central Beijing (Whalley et al., 2021), 30% of the measured  $k_{OH}$  remained unaccounted for, even if the measured and model-generated OVOCs were taken into account, which only contributed 6.5% of the total reactivity, implying that the missing reactivity could be attributed to the undetected or unrecognized species under complex environments.'

We added some discussion about the impact that the missing reactivity might have on the modelled radical concentrations in Section 4.2.1 and 4.2.3.

Section 4.2.1: 'It should be pointed out that the precedingly quantified  $X$  of 100 ppt equivalent NO was supposed to be the lowest limit in this study, if missing reactivity existed. Therefore, we performed a series of sensitivity tests by adding a generic reaction converting OH to RO<sub>2</sub> that equivalent to 30% of the total OH reactivity, to account for the possible missing reactivity in this study. The adopted degree of missing reactivity was comparable to that was observed in central Beijing (Whalley et al., 2021), which represented a significant portion of potential missing reactivity. Besides, the formed RO<sub>2</sub> species was varied to investigate the influence of different RO<sub>2</sub> types on the modelled radical concentrations including the MO<sub>2</sub> (methyl peroxy radical), ETEP (peroxy radical formed from ethene), and ACO<sub>3</sub> (acetyl peroxy radical). In these cases, the modelled OH decreased by  $1.1\sim 1.7\times 10^6\text{ cm}^{-3}$  compared to the base case, and the requested amount of  $X$  increased to be equivalent to 200~300 ppt of NO depending on the specific RO<sub>2</sub> types (Fig. S7).'

Section 4.2.3: ‘The agreements between measurement and model calculation of OH and HO<sub>2</sub> indicated that the base model without heterogeneous reaction captured the key processes for OH and HO<sub>2</sub> radical chemistry in this study.

However, care has to be taken if there was missing OH reactivity. As discussed in Sect. 4.2.1, a series of sensitivity tests had been performed to test the effect of missing reactivity on the modelled radical concentrations (Fig. S7). It turned out that when OH converted to MO<sub>2</sub>, the modelled HO<sub>2</sub> increased by  $6.2 \times 10^7 \text{ cm}^{-3}$  compared to the base case. Incorporation of HO<sub>2</sub> heterogeneous uptake process upon this case would decrease the HO<sub>2</sub> concentration by 21% and 9%, respectively, for the coefficient of 0.2 and 0.08. Still, the measured and modelled HO<sub>2</sub> discrepancy (41%) would be beyond the uncertainty of HO<sub>2</sub> simulation for coefficient of 0.2. On the contrary, for cases that OH converted to ETEP and ACO<sub>3</sub>, the modelled HO<sub>2</sub> decreased by  $1.3 \times 10^7 \text{ cm}^{-3}$  and  $1.5 \times 10^7 \text{ cm}^{-3}$ , respectively compared to the base cases, possibly due to the faster radical termination rates through RO<sub>2</sub>+HO<sub>2</sub> in both these cases compared to that of MO<sub>2</sub>. Nevertheless, the model sensitivity tests suggested that HO<sub>2</sub> uptake coefficient should be less than 0.2, if the HO<sub>2</sub> heterogeneous loss played a role during this campaign.’

8. *Pg 10, line 252: How sensitive is the model-generated contribution to OH reactivity to the physical loss rate imposed?*

**Answer:**

As shown in Fig. S3, the model-generated contribution to OH reactivity would change (increase in the afternoon and decrease at night) by less than  $1 \text{ s}^{-1}$  if imposing a boundary layer height dependent loss rate rather than a constant first-order loss rate equals to a lifetime of 8 hours to all species. The daytime OH reactivity would increase by less than 5% compared to the base case, and the modelled OH and HO<sub>2</sub> concentration would change by less than 0.5%. It indicated the model-generated contribution to OH reactivity as well as OH and HO<sub>2</sub> concentrations were insensitive to the imposed physical loss rate. Moreover, as mentioned above, the performance of the model to predict PAN concentration was good if imposing boundary layer height dependent loss rate.

We added sentences to explain the effect of the imposed physical loss rate on the modelled OH reactivity in Section 3.3 as ‘The model-generated OVOCs made comparable contribution to the measured ones (22% vs. 18%), and the model-generated contribution to OH reactivity was insensitive to the imposed physical loss rate (Fig. S3).’

9. *Section 4.2.1, lines 318 – 319: The good agreement between modelled and observed median HO<sub>2</sub> should be discussed in light of possible missing OH reactivity (which, if caused by missing VOCs, could act as a source of modelled RO<sub>2</sub> and HO<sub>2</sub>). This could also be discussed in section 4.2.3 which shows that the model to measured agreement for HO<sub>2</sub> is reduced when loss to aerosols is considered.*

**Answer:**

We performed a series of sensitivity tests and added some discussion about the impact that missing OH reactivity might have on the modelled HO<sub>2</sub> radical concentrations in section 4.2.3.

‘The agreements between measurement and model calculation of OH and HO<sub>2</sub> indicated that the base model without heterogeneous reaction captured the key processes for OH and HO<sub>2</sub> radical chemistry in this study.

As discussed in Sect. 4.2.1, a series of sensitivity tests had been performed to test the effect of missing reactivity on the modelled radical concentrations (Fig. S7). It turned out that when OH converted to MO<sub>2</sub>, the modelled HO<sub>2</sub> would increase by  $6.2 \times 10^7 \text{ cm}^{-3}$  compared to the base case which makes more potential for the HO<sub>2</sub> heterogeneous loss. However, considering the potential effect of missing reactivity on HO<sub>2</sub>, the measured and modelled HO<sub>2</sub> discrepancy (41%) would still be beyond the uncertainty of HO<sub>2</sub> simulation for coefficient of 0.2. On the contrary, for cases that OH converted to ETEP and ACO<sub>3</sub>, the modelled HO<sub>2</sub> decreased by  $1.3 \times 10^7 \text{ cm}^{-3}$  and  $1.5 \times 10^7 \text{ cm}^{-3}$ , respectively compared to the base cases, possibly due to the faster radical termination rates through RO<sub>2</sub>+HO<sub>2</sub> in both these cases compared to that of MO<sub>2</sub>. Nevertheless, the model sensitivity tests suggested that HO<sub>2</sub> uptake coefficient should be less than 0.2, if the HO<sub>2</sub> heterogeneous loss played a role during this campaign.’

*10. Pg 13, line 335: Can the authors provide the % of OH that is recycled from isoprene via the H-shift mechanism?*

**Answer:**

We added the percentage of OH that is recycled from isoprene via the H-shift mechanism in Section 4.2.1 as ‘However, during this campaign, isoprene concentration was only 0.2 ppb, contributing 5% of the modelled OH reactivity. The H-shift mechanism of isoprene derived peroxy radicals only increased 1.2% of the modelled OH concentration and thus play a minor role in OH chemistry. Therefore, other processes should account for the OH underestimation in low NO conditions.’

*11. Pg 14, lines 368 – 370: I disagree with this statement. Firstly, OH is underestimated by the model. Secondly, there are no OH reactivity observations or RO<sub>2</sub> observations to test the model against. A much fuller discussion on the  $\alpha$ -pinene oxidation mechanism used in this work is needed (see my later comment).*

**Answer:**

We revised these sentences as ‘Other studies conducted in forested environments with a strong influence of monoterpenes from pine trees emission found discrepancies of up to three times in HO<sub>2</sub> measurement-model comparison (Kim et al., 2013; Wolfe et al., 2014; Hens et al., 2014). In present study, however, HO<sub>2</sub> concentration was well



reproduced by chemical model within combined uncertainty during daytime with high monoterpenes concentrations. Nevertheless, we cannot draw solid conclusion that the monoterpenes oxidation chemistry in environment with both strong anthropogenic and biogenic influences can be captured by the applied chemical mechanisms with respect to HO<sub>x</sub> concentration, since missing HO<sub>2</sub> sources and sinks might exist simultaneously but cancel out each other. Given that there were no OH reactivity or RO<sub>2</sub> observations in this study, we cannot rule out these possibilities.’

We added the  $\alpha$ -pinene oxidation mechanism used in this work in Table S1, and performed a sensitivity test to test the influence of the isomerization of  $\alpha$ -pinene derived RO species on modelled radical concentration in Section 4.2.2 (see the later answer).

*12. Pg 18, lines 455 – 457: The lower P(Ox) determined from modelled peroxy radicals relative to the observed demonstrates that the model under-predicts the observed HO<sub>2</sub> concentration at NO concentrations greater than 1 ppb. This finding has been observed in a number of previous urban radical measurement campaigns and some discussion of this finding should be presented in this manuscript (perhaps in section 4.2).*

**Answer:**

We added some discussion about the underestimation of ozone production in urban atmosphere in Section 4.3.

‘The discrepancy for observation and model derived P(Ox) mainly appears at NO concentration larger than 1 ppb (Fig. 9). This behavior has been observed in a number of previous urban radical measurement campaigns (Kanaya et al., 2008; Kanaya et al., 2012; Martinez, 2003; Ren et al., 2003; Ren et al., 2013; Elshorbany et al., 2012; Brune et al., 2016; Whalley et al., 2018; Tan et al., 2017), which was caused by the model underprediction of the observed HO<sub>2</sub> concentrations under high NO concentration (typically NO greater than 1 ppb). Although some of the previous HO<sub>2</sub> measurement might suffer from unrecognized interference from RO<sub>2</sub> species, this kind of interference have been minimized by lowering down the added NO concentration in recent studies (Griffith et al., 2016; Brune et al., 2016). However, the underestimation of ozone production from HO<sub>2</sub> radical persist, indicating that the photochemical production mechanism of ozone under polluted urban environment is still not well understood.’

*13. Pg 18, lines 459 – 472: Whalley et al., ACP, 21, 2125 – 2147, 2021 highlighted that large RO<sub>2</sub> species, such as those deriving from  $\alpha$ -pinene, form RO species upon reaction with NO and these RO species can isomerise to form another RO<sub>2</sub> species rather than forming HO<sub>2</sub> directly. Are these types of RO isomerisations considered in the RACM2 mechanism? A discussion of the  $\alpha$ -pinene oxidation mechanism used and the impact this may have on the calculated ozone production rate is warranted here.*

**Answer:**

As suggested in Whalley et al. (2021), the RO<sub>2</sub> species derived from  $\alpha$ -pinene with ozone reaction, form RO upon reaction with NO, can isomerize to form another RO<sub>2</sub> rather than HO<sub>2</sub> directly, we performed a sensitivity test to substitute the reactions of  $\alpha$ -pinene with ozone in RACM2 by those considering RO isomerization in MCM3.3.1 to investigate the impact of this mechanism may have on the modelled radical concentration and the calculated ozone production rate. It turned out to be that the isomerization mechanism had little influence on the modelled radical concentrations as well as on the calculated ozone production. Including the isomerization mechanism would decrease OH and HO<sub>2</sub> concentrations by  $2.0 \times 10^4 \text{ cm}^{-3}$  and  $2.5 \times 10^7 \text{ cm}^{-3}$ , respectively, and reduce daily ozone production by 1 ppb.

We added some discussions about the impact of RO isomerization on modelled radical concentrations and ozone production in Section 4.2.2 and 4.3.

Section 4.2.2: ‘In recent studies, Whalley et al. (2021) highlighted that large RO<sub>2</sub> species, such as those derived from  $\alpha$ -pinene and ozone reaction, form RO species upon reaction with NO, and these RO species can isomerize to form another RO<sub>2</sub> species rather than forming HO<sub>2</sub> directly, and thus might have impact on the modelled OH and HO<sub>2</sub> concentration. We also performed a sensitivity test to substitute the reactions of  $\alpha$ -pinene with ozone in RACM2 by those considering RO isomerization in MCM3.3.1. The modelled OH and HO<sub>2</sub> concentrations decreased by  $2.0 \times 10^4 \text{ cm}^{-3}$  and  $2.5 \times 10^7 \text{ cm}^{-3}$ , respectively compared to the base model (Fig. S3), indicating that  $\alpha$ -pinene derived RO isomerization had little impact on the modelled OH and HO<sub>2</sub> concentrations in this study.’

Section 4.3: ‘Moreover, we also investigated the impact of the  $\alpha$ -pinene derived RO species which can isomerize to form another RO<sub>2</sub> rather than forming HO<sub>2</sub> directly on the calculated ozone production rate. It turned out that including  $\alpha$ -pinene derived RO isomerization mechanism in the model run would reduce the daily net O<sub>3</sub> production by 1 ppb.’

## References

- Brune, W. H., Baier, B. C., Thomas, J., Ren, X., Cohen, R. C., Pusede, S. E., Browne, E. C., Goldstein, A. H., Gentner, D. R., Keutsch, F. N., Thornton, J. A., Harrold, S., Lopez-Hilfiker, F. D., and Wennberg, P. O.: Ozone production chemistry in the presence of urban plumes, *Faraday Discuss.*, 189, 169-189, 10.1039/c5fd00204d, 2016.
- Cho, C. M., Hofzumahaus, A., Fuchs, H., Dorn, H. P., Glowania, M., Holland, F., Rohrer, F., Vardhan, V., Kiendler-Scharr, A., Wahner, A., and Novelli, A.: Characterization of a chemical modulation reactor (CMR) for the measurement of atmospheric concentrations of hydroxyl radicals with a laser-induced fluorescence instrument, *Atmospheric Measurement Techniques*, 14, 1851-1877, 10.5194/amt-14-1851-2021, 2021.

- Elshorbany, Y. F., Kleffmann, J., Hofzumahaus, A., Kurtenbach, R., Wiesen, P., Brauers, T., Bohn, B., Dorn, H. P., Fuchs, H., Holland, F., Rohrer, F., Tillmann, R., Wegener, R., Wahner, A., Kanaya, Y., Yoshino, A., Nishida, S., Kajii, Y., Martinez, M., Kubistin, D., Harder, H., Lelieveld, J., Elste, T., Plass-Duelmer, C., Stange, G., Berresheim, H., and Schurath, U.: HOx budgets during HOxComp: A case study of HOx chemistry under NOx-limited conditions, *J. Geophys. Res.-Atmos.*, 117, 10.1029/2011jd017008, 2012.
- Fuchs, H., Bohn, B., Hofzumahaus, A., Holland, F., Lu, K. D., Nehr, S., Rohrer, F., and Wahner, A.: Detection of HO<sub>2</sub> by laser-induced fluorescence: calibration and interferences from RO<sub>2</sub> radicals, *Atmospheric Measurement Techniques*, 4, 1209-1225, 10.5194/amt-4-1209-2011, 2011.
- Fuchs, H., Tan, Z., Hofzumahaus, A., Broch, S., Dorn, H.-P., Holland, F., Kuentler, C., Gomm, S., Rohrer, F., Schrader, S., Tillmann, R., and Wahner, A.: Investigation of potential interferences in the detection of atmospheric ROx radicals by laser-induced fluorescence under dark conditions, *Atmospheric Measurement Techniques*, 9, 1431-1447, 10.5194/amt-9-1431-2016, 2016.
- Fuchs, H., Tan, Z., Lu, K., Bohn, B., Broch, S., Brown, S. S., Dong, H., Gomm, S., Haeseler, R., He, L., Hofzumahaus, A., Holland, F., Li, X., Liu, Y., Lu, S., Min, K.-E., Rohrer, F., Shao, M., Wang, B., Wang, M., Wu, Y., Zeng, L., Zhang, Y., Wahner, A., and Zhang, Y.: OH reactivity at a rural site (Wangdu) in the North China Plain: contributions from OH reactants and experimental OH budget, *Atmospheric Chemistry and Physics*, 17, 645-661, 10.5194/acp-17-645-2017, 2017.
- Griffith, S. M., Hansen, R. F., Dusanter, S., Michoud, V., Gilman, J. B., Kuster, W. C., Veres, P. R., Graus, M., de Gouw, J. A., Roberts, J., Young, C., Washenfelder, R., Brown, S. S., Thalman, R., Waxman, E., Volkamer, R., Tsai, C., Stutz, J., Flynn, J. H., Grossberg, N., Lefer, B., Alvarez, S. L., Rappenglueck, B., Mielke, L. H., Osthoff, H. D., and Stevens, P. S.: Measurements of hydroxyl and hydroperoxy radicals during CalNex-LA: Model comparisons and radical budgets, *J. Geophys. Res.-Atmos.*, 121, 4211-4232, 10.1002/2015jd024358, 2016.
- Hens, K., Novelli, A., Martinez, M., Auld, J., Axinte, R., Bohn, B., Fischer, H., Keronen, P., Kubistin, D., Nölscher, A. C., Oswald, R., Paasonen, P., Petäjä, T., Regelin, E., Sander, R., Sinha, V., Sipilä, M., Taraborrelli, D., Tatum Ernest, C., Williams, J., Lelieveld, J., and Harder, H.: Observation and modelling of HOx radicals in a boreal forest, *Atmos. Chem. Phys.*, 14, 8723-8747, <https://doi.org/10.5194/acp-14-8723-2014>, 2014.
- Kanaya, Y., Fukuda, M., Akimoto, H., Takegawa, N., Komazaki, Y., Yokouchi, Y., Koike, M., and Kondo, Y.: Urban photochemistry in central Tokyo: 2. Rates and regimes of oxidant (O<sub>3</sub>+ NO<sub>2</sub>) production, *Journal of Geophysical Research*, 113, 10.1029/2007jd008671, 2008.
- Kanaya, Y., Hofzumahaus, A., Dorn, H. P., Brauers, T., Fuchs, H., Holland, F., Rohrer, F., Bohn, B., Tillmann, R., Wegener, R., Wahner, A., Kajii, Y., Miyamoto, K., Nishida, S., Watanabe, K., Yoshino, A., Kubistin, D., Martinez, M., Rudolf, M., Harder, H., Berresheim, H., Elste, T., Plass-Duelmer, C., Stange, G., Kleffmann,

- J., Elshorbany, Y., and Schurath, U.: Comparisons of observed and modeled OH and HO<sub>2</sub> concentrations during the ambient measurement period of the HO(x)Comp field campaign, *Atmospheric Chemistry and Physics*, 12, 2567-2585, 10.5194/acp-12-2567-2012, 2012.
- Kim, S., Wolfe, G. M., Mauldin, L., Cantrell, C., Guenther, A., Karl, T., Turnipseed, A., Greenberg, J., Hall, S. R., Ullmann, K., Apel, E., Hornbrook, R., Kajji, Y., Nakashima, Y., Keutsch, F. N., DiGangi, J. P., Henry, S. B., Kaser, L., Schnitzhofer, R., Graus, M., Hansel, A., Zheng, W., and Flocke, F. F.: Evaluation of HO<sub>x</sub> sources and cycling using measurement-constrained model calculations in a 2-methyl-3-butene-2-ol (MBO) and monoterpene (MT) dominated ecosystem, *Atmos. Chem. Phys.*, 13, 2031-2044, 10.5194/acp-13-2031-2013, 2013.
- Kovacs, T. A., Brune, W. H., Harder, H., Martinez, M., Simpas, J. B., Frost, G. J., Williams, E., Jobson, T., Stroud, C., Young, V., Fried, A., and Wert, B.: Direct measurements of urban OH reactivity during Nashville SOS in summer 1999, *Journal of Environmental Monitoring*, 5, 68-74, 10.1039/b204339d, 2003.
- Lou, S., Holland, F., Rohrer, F., Lu, K., Bohn, B., Brauers, T., Chang, C. C., Fuchs, H., Haeseler, R., Kita, K., Kondo, Y., Li, X., Shao, M., Zeng, L., Wahner, A., Zhang, Y., Wang, W., and Hofzumahaus, A.: Atmospheric OH reactivities in the Pearl River Delta - China in summer 2006: measurement and model results, *Atmospheric Chemistry and Physics*, 10, 11243-11260, 10.5194/acp-10-11243-2010, 2010.
- Lu, K. D., Rohrer, F., Holland, F., Fuchs, H., Bohn, B., Brauers, T., Chang, C. C., Häeseler, R., Hu, M., Kita, K., Kondo, Y., Li, X., Lou, S. R., Nehr, S., Shao, M., Zeng, L. M., Wahner, A., Zhang, Y. H., and Hofzumahaus, A.: Observation and modelling of OH and HO<sub>2</sub> concentrations in the Pearl River Delta 2006: a missing OH source in a VOC rich atmosphere, *Atmospheric Chemistry and Physics*, 12, 1541-1569, 10.5194/acp-12-1541-2012, 2012.
- Lu, K. D., Hofzumahaus, A., Holland, F., Bohn, B., Brauers, T., Fuchs, H., Hu, M., Häeseler, R., Kita, K., Kondo, Y., Li, X., Lou, S. R., Oebel, A., Shao, M., Zeng, L. M., Wahner, A., Zhu, T., Zhang, Y. H., and Rohrer, F.: Missing OH source in a suburban environment near Beijing: observed and modelled OH and HO<sub>2</sub> concentrations in summer 2006, *Atmospheric Chemistry and Physics*, 13, 1057-1080, 10.5194/acp-13-1057-2013, 2013.
- Mao, J., Ren, X., Zhang, L., Van Duin, D. M., Cohen, R. C., Park, J. H., Goldstein, A. H., Paulot, F., Beaver, M. R., Crouse, J. D., Wennberg, P. O., DiGangi, J. P., Henry, S. B., Keutsch, F. N., Park, C., Schade, G. W., Wolfe, G. M., Thornton, J. A., and Brune, W. H.: Insights into hydroxyl measurements and atmospheric oxidation in a California forest, *Atmospheric Chemistry and Physics*, 12, 8009-8020, 10.5194/acp-12-8009-2012, 2012.
- Martinez, M.: OH and HO<sub>2</sub> concentrations, sources, and loss rates during the Southern Oxidants Study in Nashville, Tennessee, summer 1999, *Journal of Geophysical Research*, 108, 10.1029/2003jd003551, 2003.
- Novelli, A., Hens, K., Ernest, C. T., Kubistin, D., Regelin, E., Elste, T., Plass-Duelmer, C., Martinez, M., Lelieveld, J., and Harder, H.: Characterisation of an inlet pre-

- injector laser-induced fluorescence instrument for the measurement of atmospheric hydroxyl radicals, *Atmospheric Measurement Techniques*, 7, 3413-3430, 10.5194/amt-7-3413-2014, 2014.
- Novelli, A., Hens, K., Ernest, C. T., Martinez, M., Noelscher, A. C., Sinha, V., Paasonen, P., Petaja, T., Sipila, M., Elste, T., Plass-Duelmer, C., Phillips, G. J., Kubistin, D., Williams, J., Vereecken, L., Lelieveld, J., and Harder, H.: Estimating the atmospheric concentration of Criegee intermediates and their possible interference in a FAGE-LIF instrument, *Atmospheric Chemistry and Physics*, 17, 7807-7826, 10.5194/acp-17-7807-2017, 2017.
- Ren, X., van Duin, D., Cazorla, M., Chen, S., Mao, J., Zhang, L., Brune, W. H., Flynn, J. H., Grossberg, N., Lefer, B. L., Rappenglück, B., Wong, K. W., Tsai, C., Stutz, J., Dibb, J. E., Thomas Jobson, B., Luke, W. T., and Kelley, P.: Atmospheric oxidation chemistry and ozone production: Results from SHARP 2009 in Houston, Texas, *Journal of Geophysical Research: Atmospheres*, 118, 5770-5780, 10.1002/jgrd.50342, 2013.
- Ren, X. R., Harder, H., Martinez, M., Leshner, R. L., Olinger, A., Shirley, T., Adams, J., Simpas, J. B., and Brune, W. H.: HO<sub>x</sub> concentrations and OH reactivity observations in New York City during PMTACS-NY2001, *Atmospheric Environment*, 37, 3627-3637, 10.1016/s1352-2310(03)00460-6, 2003.
- Saunders, S. M., Jenkin, M. E., Derwent, R. G., and Pilling, M. J.: Protocol for the development of the Master Chemical Mechanism, MCM v3 (Part A): tropospheric degradation of non-aromatic volatile organic compounds, *Atmospheric Chemistry and Physics*, 3, 161-180, 2003.
- Shirley, T. R., Brune, W. H., Ren, X., Mao, J., Leshner, R., Cardenas, B., Volkamer, R., Molina, L. T., Molina, M. J., Lamb, B., Velasco, E., Jobson, T., and Alexander, M.: Atmospheric oxidation in the Mexico City Metropolitan Area (MCMA) during April 2003, *Atmospheric Chemistry and Physics*, 6, 2753-2765, 2006.
- Tan, Z., Fuchs, H., Lu, K., Hofzumahaus, A., Bohn, B., Broch, S., Dong, H., Gomm, S., Haeseler, R., He, L., Holland, F., Li, X., Liu, Y., Lu, S., Rohrer, F., Shao, M., Wang, B., Wang, M., Wu, Y., Zeng, L., Zhang, Y., Wahner, A., and Zhang, Y.: Radical chemistry at a rural site (Wangdu) in the North China Plain: observation and model calculations of OH, HO<sub>2</sub> and RO<sub>2</sub> radicals, *Atmospheric Chemistry and Physics*, 17, 663-690, 10.5194/acp-17-663-2017, 2017.
- Tan, Z., Lu, K., Hofzumahaus, A., Fuchs, H., Bohn, B., Holland, F., Liu, Y., Rohrer, F., Shao, M., Sun, K., Wu, Y., Zeng, L., Zhang, Y., Zou, Q., Kiendler-Scharr, A., Wahner, A., and Zhang, Y.: Experimental budgets of OH, HO<sub>2</sub>, and RO<sub>2</sub> radicals and implications for ozone formation in the Pearl River Delta in China 2014, *Atmospheric Chemistry and Physics*, 19, 7129-7150, 10.5194/acp-19-7129-2019, 2019.
- Wang, F. Y., Hu, R. Z., Chen, H., Xie, P. H., Wang, Y. H., Li, Z. Y., Jin, H. W., Liu, J. G., and Liu, W. Q.: Development of a field system for measurement of tropospheric OH radical using laser-induced fluorescence technique, *Opt Express*, 27, A419-A435, 10.1364/Oe.27.00a419, 2019.
- Whalley, L. K., Blitz, M. A., Desservettaz, M., Seakins, P. W., and Heard, D. E.:

- Reporting the sensitivity of laser-induced fluorescence instruments used for HO<sub>2</sub> detection to an interference from RO<sub>2</sub> radicals and introducing a novel approach that enables HO<sub>2</sub> and certain RO<sub>2</sub> types to be selectively measured, *Atmospheric Measurement Techniques*, 6, 3425-3440, 10.5194/amt-6-3425-2013, 2013.
- Whalley, L. K., Stone, D., Bandy, B., Dunmore, R., Hamilton, J. F., Hopkins, J., Lee, J. D., Lewis, A. C., and Heard, D. E.: Atmospheric OH reactivity in central London: observations, model predictions and estimates of in situ ozone production, *Atmospheric Chemistry and Physics*, 16, 2109-2122, 10.5194/acp-16-2109-2016, 2016.
- Whalley, L. K., Stone, D., Dunmore, R., Hamilton, J., Hopkins, J. R., Lee, J. D., Lewis, A. C., Williams, P., Kleffmann, J., Laufs, S., Woodward-Massey, R., and Heard, D. E.: Understanding in situ ozone production in the summertime through radical observations and modelling studies during the Clean air for London project (ClearfLo), *Atmospheric Chemistry and Physics*, 18, 2547-2571, 10.5194/acp-18-2547-2018, 2018.
- Whalley, L. K., Slater, E. J., Woodward-Massey, R., Ye, C. X., Lee, J. D., Squires, F., Hopkins, J. R., Dunmore, R. E., Shaw, M., Hamilton, J. F., Lewis, A. C., Mehra, A., Worrall, S. D., Bacak, A., Bannan, T. J., Coe, H., Percival, C. J., Ouyang, B., Jones, R. L., Crilley, L. R., Kramer, L. J., Bloss, W. J., Vu, T., Kotthaus, S., Grimmond, S., Sun, Y. L., Xu, W. Q., Yue, S. Y., Ren, L. J., Acton, W. J. F., Hewitt, C. N., Wang, X. M., Fu, P. Q., and Heard, D. E.: Evaluating the sensitivity of radical chemistry and ozone formation to ambient VOCs and NO<sub>x</sub> in Beijing, *Atmospheric Chemistry and Physics*, 21, 2125-2147, 10.5194/acp-21-2125-2021, 2021.
- Wolfe, G. M., Cantrell, C., Kim, S., Mauldin III, R. L., Karl, T., Harley, P., Turnipseed, A., Zheng, W., Flocke, F., Apel, E. C., Hornbrook, R. S., Hall, S. R., Ullmann, K., Henry, S. B., DiGangi, J. P., Boyle, E. S., Kaser, L., Schnitzhofer, R., Hansel, A., Graus, M., Nakashima, Y., Kajii, Y., Guenther, A., and Keutsch, F. N.: Missing peroxy radical sources within a summertime ponderosa pine forest, *Atmos. Chem. Phys.*, 14, 4715-4732, 10.5194/acp-14-4715-2014, 2014.
- Woodward-Massey, R., Slater, E. J., Alen, J., Ingham, T., Cryer, D. R., Stimpson, L. M., Ye, C. X., Seakins, P. W., Whalley, L. K., and Heard, D. E.: Implementation of a chemical background method for atmospheric OH measurements by laser-induced fluorescence: characterisation and observations from the UK and China, *Atmospheric Measurement Techniques*, 13, 3119-3146, 10.5194/amt-13-3119-2020, 2020.
- Yang, Y., Shao, M., Wang, X., Noelscher, A. C., Kessel, S., Guenther, A., and Williams, J.: Towards a quantitative understanding of total OH reactivity: A review, *Atmospheric Environment*, 134, 147-161, 10.1016/j.atmosenv.2016.03.010, 2016.
